# Supplementary material for: Feasibility and Acceptability of a Cognitive Training Study in Individuals with Type 2 Diabetes Mellitus
Source: MDPI journal article supplement (doi:10.3390/diabetology4020016), 2023-04-19
Supplement: s1 [file s1]

Archive with 4 entries (4 files):
- Supplementary_material _S2_Training_and_Test_Batteries.pdf
- Supplementary_material_S1_CONSORT_Checklist.pdf
- Supplementary_material_S3_Study_Interview_Guide.pdf
- Supplementary_material_S4_Acceptability_Themes.pdf
