# Supplementary material for: Feasibility and Acceptability of a Cognitive Training Study in Individuals with Type 2 Diabetes Mellitus
Source: MDPI journal article supplement (doi:10.3390/diabetology4020016), 2023-04-19
Supplement: s1 [file s1 › Supplementary_material _S2_Training_and_Test_Batteries.pdf]

**Table S1.** Neuropsychological test battery.

| <b>Task</b>                                      | <b>Mode</b>                      | <b>Administration time</b> | <b>Domain measured</b>            |
|--------------------------------------------------|----------------------------------|----------------------------|-----------------------------------|
| <b>Reaction time (RTI)</b>                       | Clinical mode                    | 5 minutes                  | Reaction time & motor response    |
| <b>Paired associated learning (PAL)</b>          | Clinical mode                    | 10 minutes                 | Visual memory & new learning      |
| <b>Spatial working memory (SWM)</b>              | Clinical mode                    | 9 minutes                  | Executive function/working memory |
| <b>Pattern recognition memory (PRM)</b>          | Clinical mode<br>(Complete mode) | 4 minutes                  | Visual pattern recognition memory |
| <b>Delayed match to sample (DMS)</b>             | Clinical mode                    | 12 minutes                 | Visual matching ability           |
| <b>Rapid visual information processing (RVP)</b> | Clinical mode                    | 7 minutes                  | Sustained attention               |

**Table S2.** Training test battery.

| <b>Task</b>                                   | <b>Mode</b>                         | <b>Administration time</b> | <b>Domain measured</b>            |
|-----------------------------------------------|-------------------------------------|----------------------------|-----------------------------------|
| <b>Choice reaction task (CRT)</b>             | Clinical mode                       | 6 minutes                  | Reaction time & motor speed       |
| <b>Verbal recognition memory (VRM)</b>        | Clinical<br>(Immediate and delayed) | 20 minutes                 | Verbal memory & new learning      |
| <b>Attention switching task (ATS)</b>         | 8d1-12d2-16s-4s4d-80s80da           | 6 minutes                  | Attentional set shifting          |
| <b>Spatial span (SSP)</b>                     | Clinical                            | 5 minutes                  | Visuospatial working memory       |
| <b>Stop signal task (SST)</b>                 | Clinical                            | 20 minutes                 | Response inhibition               |
| <b>One touch stockings of Cambridge (OTS)</b> | 5-choice-legacy-20                  | 7 minutes                  | Spatial planning & working memory |
