# Supplementary material for: Feasibility and Acceptability of a Cognitive Training Study in Individuals with Type 2 Diabetes Mellitus
Source: MDPI journal article supplement (doi:10.3390/diabetology4020016), 2023-04-19
Supplement: s1 [file s1 › Supplementary_material_S1_CONSORT_Checklist.pdf]

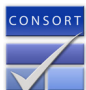

## CONSORT 2010 checklist of information to include when reporting a pilot or feasibility trial\*

| Section/Topic             | Item No | Checklist item                                                                                                                                               | Reported on page No                                                                                   |
|---------------------------|---------|--------------------------------------------------------------------------------------------------------------------------------------------------------------|-------------------------------------------------------------------------------------------------------|
| <b>Title and abstract</b> |         |                                                                                                                                                              |                                                                                                       |
|                           | 1a      | Identification as a pilot or feasibility randomised trial in the title                                                                                       | Page 1                                                                                                |
|                           | 1b      | Structured summary of pilot trial design, methods, results, and conclusions (for specific guidance see CONSORT abstract extension for pilot trials)          | Page 1                                                                                                |
| <b>Introduction</b>       |         |                                                                                                                                                              |                                                                                                       |
| Background and objectives | 2a      | Scientific background and explanation of rationale for future definitive trial, and reasons for randomised pilot trial                                       | Page 1-2                                                                                              |
|                           | 2b      | Specific objectives or research questions for pilot trial                                                                                                    | Page 2                                                                                                |
| <b>Methods</b>            |         |                                                                                                                                                              |                                                                                                       |
| Trial design              | 3a      | Description of pilot trial design (such as parallel, factorial) including allocation ratio                                                                   | Page 2-3                                                                                              |
|                           | 3b      | Important changes to methods after pilot trial commencement (such as eligibility criteria), with reasons                                                     | Page 7-8                                                                                              |
| Participants              | 4a      | Eligibility criteria for participants                                                                                                                        | Page 3                                                                                                |
|                           | 4b      | Settings and locations where the data were collected                                                                                                         | Page 2-3                                                                                              |
|                           | 4c      | How participants were identified and consented                                                                                                               | Page 2-3                                                                                              |
| Interventions             | 5       | The interventions for each group with sufficient details to allow replication, including how and when they were actually administered                        | Page 4-5                                                                                              |
| Outcomes                  | 6a      | Completely defined prespecified assessments or measurements to address each pilot trial objective specified in 2b, including how and when they were assessed | Feasibility<br>Page 5<br>Acceptability<br>Page 6<br>Cognition<br>Page 6<br>(Supplementary material 2) |
|                           | 6b      | Any changes to pilot trial assessments or measurements after the pilot trial commenced, with reasons                                                         | N/A                                                                                                   |
|                           | 6c      | If applicable, prespecified criteria used to judge whether, or how, to proceed with future definitive trial                                                  | Page 6                                                                                                |
| Sample size               | 7a      | Rationale for numbers in the pilot trial                                                                                                                     | N/A                                                                                                   |
|                           | 7b      | When applicable, explanation of any interim analyses and stopping guidelines                                                                                 | N/A                                                                                                   |

|                                                      |     |                                                                                                                                                                                             |                                                                                   |
|------------------------------------------------------|-----|---------------------------------------------------------------------------------------------------------------------------------------------------------------------------------------------|-----------------------------------------------------------------------------------|
| Randomisation:                                       |     |                                                                                                                                                                                             |                                                                                   |
| Sequence generation                                  | 8a  | Method used to generate the random allocation sequence                                                                                                                                      | Page 2-3                                                                          |
|                                                      | 8b  | Type of randomisation(s); details of any restriction (such as blocking and block size)                                                                                                      | Page 2-3                                                                          |
| Allocation concealment mechanism                     | 9   | Mechanism used to implement the random allocation sequence (such as sequentially numbered containers), describing any steps taken to conceal the sequence until interventions were assigned | Page 2-3                                                                          |
| Implementation                                       | 10  | Who generated the random allocation sequence, who enrolled participants, and who assigned participants to interventions                                                                     | Page 2-3                                                                          |
| Blinding                                             | 11a | If done, who was blinded after assignment to interventions (for example, participants, care providers, those assessing outcomes) and how                                                    | N/A                                                                               |
|                                                      | 11b | If relevant, description of the similarity of interventions                                                                                                                                 | N/A                                                                               |
| Statistical methods                                  | 12  | Methods used to address each pilot trial objective whether qualitative or quantitative                                                                                                      | Page 6                                                                            |
| <b>Results</b>                                       |     |                                                                                                                                                                                             |                                                                                   |
| Participant flow (a diagram is strongly recommended) | 13a | For each group, the numbers of participants who were approached and/or assessed for eligibility, randomly assigned, received intended treatment, and were assessed for each objective       | Page 6                                                                            |
|                                                      | 13b | For each group, losses and exclusions after randomisation, together with reasons                                                                                                            | Page 6                                                                            |
| Recruitment                                          | 14a | Dates defining the periods of recruitment and follow-up                                                                                                                                     | Page 2-3                                                                          |
|                                                      | 14b | Why the pilot trial ended or was stopped                                                                                                                                                    | N/A                                                                               |
| Baseline data                                        | 15  | A table showing baseline demographic and clinical characteristics for each group                                                                                                            | Page 7                                                                            |
| Numbers analysed                                     | 16  | For each objective, number of participants (denominator) included in each analysis. If relevant, these numbers should be by randomised group                                                | Feasibility<br>Page 7<br><br>Acceptability<br>Page 10<br><br>Cognition<br>Page 11 |
| Outcomes and estimation                              | 17  | For each objective, results including expressions of uncertainty (such as 95% confidence interval) for any estimates. If relevant, these results should be by randomised group              | Feasibility –<br>Page 7<br><br>Acceptability<br>Page 9-10<br>Supplementar         |

|                          |     |                                                                                                                                                     |                                          |
|--------------------------|-----|-----------------------------------------------------------------------------------------------------------------------------------------------------|------------------------------------------|
|                          |     |                                                                                                                                                     | y material 3<br><br>Cognition<br>Page 11 |
| Ancillary analyses       | 18  | Results of any other analyses performed that could be used to inform the future definitive trial                                                    | Cognition<br>(Effect sizes)<br>Page 11   |
| Harms                    | 19  | All important harms or unintended effects in each group (for specific guidance see CONSORT for harms)                                               | N/A                                      |
|                          | 19a | If relevant, other important unintended consequences                                                                                                | N/A                                      |
| <b>Discussion</b>        |     |                                                                                                                                                     |                                          |
| Limitations              | 20  | Pilot trial limitations, addressing sources of potential bias and remaining uncertainty about feasibility                                           | Page 12-15                               |
| Generalisability         | 21  | Generalisability (applicability) of pilot trial methods and findings to future definitive trial and other studies                                   | Page 12-15                               |
| Interpretation           | 22  | Interpretation consistent with pilot trial objectives and findings, balancing potential benefits and harms, and considering other relevant evidence | Page 12-15                               |
|                          | 22a | Implications for progression from pilot to future definitive trial, including any proposed amendments                                               | Page 12-15                               |
| <b>Other information</b> |     |                                                                                                                                                     |                                          |
| Registration             | 23  | Registration number for pilot trial and name of trial registry                                                                                      | N/A                                      |
| Protocol                 | 24  | Where the pilot trial protocol can be accessed, if available                                                                                        | N/A                                      |
| Funding                  | 25  | Sources of funding and other support (such as supply of drugs), role of funders                                                                     | N/A                                      |
|                          | 26  | Ethical approval or approval by research review committee, confirmed with reference number                                                          | Page 2-3                                 |
