# Supplementary material for: Feasibility and Acceptability of a Cognitive Training Study in Individuals with Type 2 Diabetes Mellitus
Source: MDPI journal article supplement (doi:10.3390/diabetology4020016), 2023-04-19
Supplement: s1 [file s1 › Supplementary_material_S3_Study_Interview_Guide.pdf]

**Table S1.** Study interview guide.

|                                                                                                                                                                                                                                                                                                                                                                                                                                                                                                                                                              |
|--------------------------------------------------------------------------------------------------------------------------------------------------------------------------------------------------------------------------------------------------------------------------------------------------------------------------------------------------------------------------------------------------------------------------------------------------------------------------------------------------------------------------------------------------------------|
| <b>1. Assessment visits</b>                                                                                                                                                                                                                                                                                                                                                                                                                                                                                                                                  |
| <ul style="list-style-type: none"><li>• What were your thoughts and feelings prior to the initial cognitive assessment?</li><li>• How did you find the difficulty of assessment tasks?</li><li>• Did you find the length of the assessment visit appropriate?</li><li>• What were your thoughts and feelings with regards to giving blood samples?</li><li>• Did you think it is appropriate to extract blood samples in adults with T2DM?</li></ul>                                                                                                         |
| <b>2. Cognitive training</b>                                                                                                                                                                                                                                                                                                                                                                                                                                                                                                                                 |
| <ul style="list-style-type: none"><li>• What were your thoughts and feeling towards being allocated to the cognitive training group?</li><li>• How did you find the difficulty of tasks throughout the training period?</li><li>• Was the length of training visits appropriate?</li><li>• Was the number of training visits a week suitable?</li><li>• Was the overall length of the training intervention appropriate?</li><li>• How did you find using the study equipment?</li><li>• Did you find using the brain training sessions enjoyable?</li></ul> |
| <b>3. Usual care control</b>                                                                                                                                                                                                                                                                                                                                                                                                                                                                                                                                 |
| <ul style="list-style-type: none"><li>• What were your thoughts and feelings prior to the initial cognitive assessment?</li><li>• What were your thoughts and feelings when allocated to the control group?</li><li>• What were your thoughts and feelings prior to the follow up visits?</li><li>• Was your motivation influenced by the randomisation to the control group?</li><li>• Do you have any suggestions for improving the control group experience?</li></ul>                                                                                    |
| <b>4. Study location</b>                                                                                                                                                                                                                                                                                                                                                                                                                                                                                                                                     |
| <ul style="list-style-type: none"><li>• How did you find travelling to and from the university?</li><li>• What were your thoughts and feelings towards been given the choice of training locations and timings?</li><li>• Did you prefer home or university visits?</li><li>• Do you think an intervention like this would benefit from group sessions?</li></ul>                                                                                                                                                                                            |
